# Supplementary material for: Prospects for Long-Term Agriculture in Southern Africa: Emergent Dynamics of Savannah Ecosystems from Remote Sensing Observations
Source: MDPI journal article supplement (doi:10.3390/rs13152954), 2021-07-27
Supplement: s1 [file s1]

# Supplementary Materials

## Supplementary Tables

Table S1 briefly summarizes the climatology of the region. Note that dynamic wetland mapping is not incorporated into the land cover comparison here since wetland areal extent changes depending on the time of year. For land cover type comparisons of annual and interannual rainfall differences, masking permanent wetland areas from the MODIS MCD12Q1 Version 6 IGBP classification is sufficient. For analyses at finer temporal resolutions, dynamic wetland classification is used to define wetland areal extent (Figures 16 through 18).

**Table S1.** Mean seasonal and annual accumulated precipitation for each land cover type

| Year | Land Cover Type*   | Rainy Season Period<br>(November to October) | Rainy Season Mean<br>Precipitation<br>(mm/season) | Dry Season Mean<br>Precipitation<br>(mm/season) | Annual** Mean<br>Precipitation<br>(mm/yr) |
|------|--------------------|----------------------------------------------|---------------------------------------------------|-------------------------------------------------|-------------------------------------------|
| 2009 | All Land Cover     | 2009–2010                                    | 970.28                                            | 87.62                                           | 1020.92                                   |
|      | Miombo             |                                              | 994.23                                            | 96.85                                           | 1063.06                                   |
|      | Woody Savanna      |                                              | 1262.08                                           | 126.58                                          | 1303.98                                   |
|      | Grass Savanna      |                                              | 862.81                                            | 70.19                                           | 912.20                                    |
|      | Barren/Built-up    |                                              | 1113.65                                           | 104.40                                          | 1189.69                                   |
|      | Permanent Wetlands |                                              | 873.45                                            | 70.80                                           | 895.49                                    |
| 2010 | All Land Cover     | 2010–2011                                    | 952.93                                            | 54.03                                           | 1023.82                                   |
|      | Miombo             |                                              | 964.44                                            | 53.29                                           | 1024.96                                   |
|      | Woody Savanna      |                                              | 1154.25                                           | 104.04                                          | 1351.15                                   |
|      | Grass Savanna      |                                              | 881.52                                            | 36.12                                           | 910.11                                    |
|      | Barren/Built-up    |                                              | 1052.49                                           | 60.04                                           | 1171.89                                   |
|      | Permanent Wetlands |                                              | 965.55                                            | 32.61                                           | 938.92                                    |
| 2011 | All Land Cover     | 2011–2012                                    | 869.33                                            | 49.52                                           | 973.16                                    |
|      | Miombo             |                                              | 858.14                                            | 51.89                                           | 982.28                                    |
|      | Woody Savanna      |                                              | 1112.14                                           | 83.28                                           | 1180.56                                   |
|      | Grass Savanna      |                                              | 790.21                                            | 36.76                                           | 899.49                                    |
|      | Barren/Built-up    |                                              | 1021.98                                           | 68.68                                           | 1088.07                                   |
|      | Permanent Wetlands |                                              | 780.00                                            | 31.58                                           | 963.74                                    |
| 2012 | All Land Cover     | 2012–2013                                    | 784.56                                            | 61.25                                           | 894.93                                    |
|      | Miombo             |                                              | 760.65                                            | 59.19                                           | 872.40                                    |
|      | Woody Savanna      |                                              | 1060.61                                           | 109.24                                          | 1187.21                                   |
|      | Grass Savanna      |                                              | 696.99                                            | 44.81                                           | 802.86                                    |
|      | Barren/Built-up    |                                              | 958.76                                            | 70.99                                           | 1074.52                                   |
|      | Permanent Wetlands |                                              | 686.44                                            | 44.33                                           | 762.20                                    |
| 2013 | All Land Cover     | 2013–2014                                    | 973.50                                            | 57.41                                           | 899.79                                    |
|      | Miombo             |                                              | 975.56                                            | 58.11                                           | 876.16                                    |
|      | Woody Savanna      |                                              | 1203.54                                           | 97.26                                           | 1188.27                                   |
|      | Grass Savanna      |                                              | 897.38                                            | 43.61                                           | 810.70                                    |
|      | Barren/Built-up    |                                              | 1084.71                                           | 81.80                                           | 1048.45                                   |
|      | Permanent Wetlands |                                              | 880.46                                            | 42.35                                           | 801.36                                    |
| 2014 | All Land Cover     | 2014–2015                                    | 725.31                                            | 49.08                                           | 966.00                                    |
|      | Miombo             |                                              | 758.45                                            | 51.35                                           | 990.83                                    |
|      | Woody Savanna      |                                              | 1008.32                                           | 91.87                                           | 1262.36                                   |
|      | Grass Savanna      |                                              | 623.66                                            | 34.25                                           | 862.97                                    |
|      | Barren/Built-up    |                                              | 867.89                                            | 80.24                                           | 1148.62                                   |
|      | Permanent Wetlands |                                              | 580.16                                            | 27.29                                           | 863.42                                    |
| 2015 | All Land Cover     | 2015–2016                                    | 803.95                                            | 43.18                                           | 768.38                                    |
|      | Miombo             |                                              | 824.94                                            | 47.12                                           | 822.24                                    |
|      | Woody Savanna      |                                              | 1086.95                                           | 85.36                                           | 1141.58                                   |
|      | Grass Savanna      |                                              | 708.52                                            | 28.25                                           | 633.73                                    |

|      |                    |           |         |        |         |
|------|--------------------|-----------|---------|--------|---------|
|      | Barren/Built-up    |           | 903.21  | 59.93  | 926.78  |
|      | Permanent Wetlands |           | 737.07  | 26.70  | 606.99  |
| 2016 | All Land Cover     | 2016–2017 | 936.01  | 59.84  | 885.68  |
|      | Miombo             |           | 946.19  | 60.56  | 889.97  |
|      | Woody Savanna      |           | 1186.55 | 126.42 | 1193.57 |
|      | Grass Savanna      |           | 855.05  | 38.22  | 787.78  |
|      | Barren/Built-up    |           | 1097.61 | 88.04  | 1012.61 |
|      | Permanent Wetlands |           | 818.46  | 31.35  | 791.97  |
| 2017 | All Land Cover     | 2017–2018 | 910.02  | 66.42  | 1020.98 |
|      | Miombo             |           | 914.71  | 72.64  | 1042.64 |
|      | Woody Savanna      |           | 1179.21 | 113.54 | 1346.67 |
|      | Grass Savanna      |           | 826.98  | 49.79  | 915.23  |
|      | Barren/Built-up    |           | 1057.42 | 85.76  | 1203.66 |
|      | Permanent Wetlands |           | 844.05  | 52.35  | 914.59  |
| 2018 | All Land Cover     | 2018–2019 | 819.00  | 66.29  | 961.39  |
|      | Miombo             |           | 840.38  | 68.36  | 950.18  |
|      | Woody Savanna      |           | 1171.21 | 114.99 | 1290.78 |
|      | Grass Savanna      |           | 701.55  | 49.95  | 860.42  |
|      | Barren/Built-up    |           | 1012.08 | 83.50  | 1141.88 |
|      | Permanent Wetlands |           | 633.60  | 58.76  | 858.06  |

\* Since the dynamic wetland mapping changes depending on the time of year, MCD12Q1 annual land cover was used to identify permanent wetland areas. The areas corresponding to other land cover types are masked here based on the remaining land cover pixels after permanent wetland are masked out. \*\* Annual precipitation here is accumulated over the calendar year, from January to December.

Based on the mean albedo values for grass savanna listed in Table S2 and the mean annual calendar year precipitation for grass savanna listed in Table S1, grass savanna land cover exhibits the largest interannual variability in albedo. Miombo and woody savanna albedo values are more consistent from year to year, which may be attributed to more extensive lateral root systems and vertical tap roots associated with trees and woody plants in this region. Albedo values for grass savanna increase in drier years (i.e., 2015 and 2016 albedo values are relatively high for grass savanna with the least amount of accumulated rainfall relative to other years in the study period), as expected for increased bare soil exposure as grass savanna plants experience water stress.

**Table S2.** Mean albedo values and accumulated precipitation (JFMA, MJJAS, OND) for each land cover type

| Year | Land Cover Type*   | Annual Mean Albedo (12:00 Local Time) | JFMA** Mean Precipitation (mm/period) | MJJAS ** Mean Precipitation (mm/period) | OND** Mean Precipitation (mm/period) |
|------|--------------------|---------------------------------------|---------------------------------------|-----------------------------------------|--------------------------------------|
| 2009 | All Land Cover     | 0.13                                  | 574.99                                | 39.15                                   | 364.82                               |
|      | Miombo             | 0.13                                  | 558.23                                | 42.56                                   | 385.29                               |
|      | Woody Savanna      | 0.11                                  | 697.15                                | 51.69                                   | 524.72                               |
|      | Grass Savanna      | 0.13                                  | 540.46                                | 33.92                                   | 303.41                               |
|      | Barren/Built-up    | 0.14                                  | 576.83                                | 40.17                                   | 379.93                               |
|      | Permanent Wetlands | 0.10                                  | 547.25                                | 38.39                                   | 280.15                               |
| 2010 | All Land Cover     | 0.13                                  | 610.25                                | 15.49                                   | 356.95                               |
|      | Miombo             | 0.13                                  | 585.55                                | 15.70                                   | 350.54                               |
|      | Woody Savanna      | 0.11                                  | 779.66                                | 27.87                                   | 512.36                               |
|      | Grass Savanna      | 0.13                                  | 560.30                                | 10.91                                   | 304.35                               |
|      | Barren/Built-up    | 0.15                                  | 568.35                                | 11.37                                   | 347.22                               |
|      | Permanent Wetlands | 0.10                                  | 593.53                                | 15.64                                   | 299.18                               |
| 2011 | All Land Cover     | 0.13                                  | 593.10                                | 15.30                                   | 323.55                               |
|      | Miombo             | 0.12                                  | 580.04                                | 15.51                                   | 317.39                               |
|      | Woody Savanna      | 0.11                                  | 688.63                                | 25.20                                   | 439.51                               |

|      |                    |      |        |       |        |
|------|--------------------|------|--------|-------|--------|
|      | Grass Savanna      | 0.13 | 567.62 | 11.70 | 285.87 |
|      | Barren/Built-up    | 0.14 | 572.71 | 18.24 | 351.47 |
|      | Permanent Wetlands | 0.10 | 649.53 | 13.33 | 268.09 |
| 2012 | All Land Cover     | 0.13 | 542.97 | 18.59 | 297.79 |
|      | Miombo             | 0.13 | 512.54 | 18.32 | 280.59 |
|      | Woody Savanna      | 0.11 | 703.49 | 35.67 | 420.84 |
|      | Grass Savanna      | 0.14 | 498.48 | 12.55 | 260.96 |
|      | Barren/Built-up    | 0.14 | 562.55 | 20.35 | 324.23 |
|      | Permanent Wetlands | 0.10 | 508.55 | 15.82 | 214.61 |
| 2013 | All Land Cover     | 0.13 | 495.76 | 17.09 | 350.34 |
|      | Miombo             | 0.13 | 468.95 | 18.23 | 328.93 |
|      | Woody Savanna      | 0.11 | 686.63 | 30.48 | 444.29 |
|      | Grass Savanna      | 0.14 | 440.16 | 12.14 | 327.09 |
|      | Barren/Built-up    | 0.14 | 492.53 | 19.53 | 314.51 |
|      | Permanent Wetlands | 0.10 | 483.67 | 12.80 | 280.86 |
| 2014 | All Land Cover     | 0.13 | 620.30 | 12.79 | 292.60 |
|      | Miombo             | 0.13 | 618.57 | 12.39 | 292.62 |
|      | Woody Savanna      | 0.11 | 797.15 | 23.30 | 413.45 |
|      | Grass Savanna      | 0.14 | 566.30 | 9.36  | 254.12 |
|      | Barren/Built-up    | 0.14 | 618.61 | 15.16 | 321.54 |
|      | Permanent Wetlands | 0.10 | 605.93 | 11.86 | 221.14 |
| 2015 | All Land Cover     | 0.13 | 437.55 | 19.23 | 281.22 |
|      | Miombo             | 0.13 | 450.48 | 20.70 | 295.80 |
|      | Woody Savanna      | 0.11 | 639.48 | 41.06 | 435.03 |
|      | Grass Savanna      | 0.14 | 370.07 | 11.56 | 227.89 |
|      | Barren/Built-up    | 0.14 | 447.82 | 24.56 | 295.08 |
|      | Permanent Wetlands | 0.10 | 363.71 | 11.60 | 215.52 |
| 2016 | All Land Cover     | 0.14 | 512.37 | 21.95 | 314.74 |
|      | Miombo             | 0.13 | 497.81 | 22.59 | 310.25 |
|      | Woody Savanna      | 0.11 | 669.59 | 46.22 | 449.84 |
|      | Grass Savanna      | 0.15 | 469.50 | 13.82 | 274.53 |
|      | Barren/Built-up    | 0.14 | 469.02 | 24.71 | 324.23 |
|      | Permanent Wetlands | 0.11 | 522.14 | 12.94 | 236.77 |
| 2017 | All Land Cover     | 0.13 | 617.37 | 18.02 | 343.27 |
|      | Miombo             | 0.13 | 606.57 | 18.50 | 347.17 |
|      | Woody Savanna      | 0.11 | 788.90 | 31.78 | 495.40 |
|      | Grass Savanna      | 0.14 | 571.05 | 13.53 | 295.81 |
|      | Barren/Built-up    | 0.14 | 611.22 | 18.58 | 344.46 |
|      | Permanent Wetlands | 0.11 | 580.07 | 13.96 | 296.99 |
| 2018 | All Land Cover     | 0.13 | 574.98 | 19.46 | 327.58 |
|      | Miombo             | 0.13 | 542.52 | 18.41 | 321.35 |
|      | Woody Savanna      | 0.11 | 736.26 | 35.29 | 489.16 |
|      | Grass Savanna      | 0.14 | 536.03 | 14.59 | 278.18 |
|      | Barren/Built-up    | 0.14 | 561.57 | 20.08 | 340.44 |
|      | Permanent Wetlands | 0.11 | 562.81 | 14.44 | 251.67 |

\* Since the dynamic wetland mapping changes depending on the time of year, MCD12Q1 annual land cover was used to identify permanent wetland areas. The areas corresponding to other land cover types are masked here based on the remaining land cover pixels after permanent wetland are masked out. \*\* JFMA, MJJAS, and OND refer to the months of the year, namely January, February, March, and April (JFMA), May, June, July, August, and September (MJJAS), and October, November, and December (OND).
